# Supplementary material for: EGFR as a therapeutic target for human, canine, and mouse ACTH-secreting pituitary adenomas
Source: JCI journal article supplement (doi:10.1172/jci60417), 2011-11-21

**Supplemental Figure 1. Gefitinib has no apparent effect on *POMC* expression in normal canine corticotrophs**

A pituitary was obtained from a dog euthanized for non-adrenal illness with propofol and sodium pentobarbital. The dog had not received medications known to interfere with the pituitary adrenal axis for at least 8 weeks prior to euthanasia. The pituitary gland was removed within 5 minutes and tissues processed. Pituitary cells were dispersed, cultured, and treated with gefitinib (0.1 – 10  $\mu$ M) for 24 hours. Canine *POMC* expression levels were measured by Real-time PCR. A representative experiment normalized by *RPS5* is depicted. Values are mean  $\pm$  SEM.

Supplemental  
Figure. 1

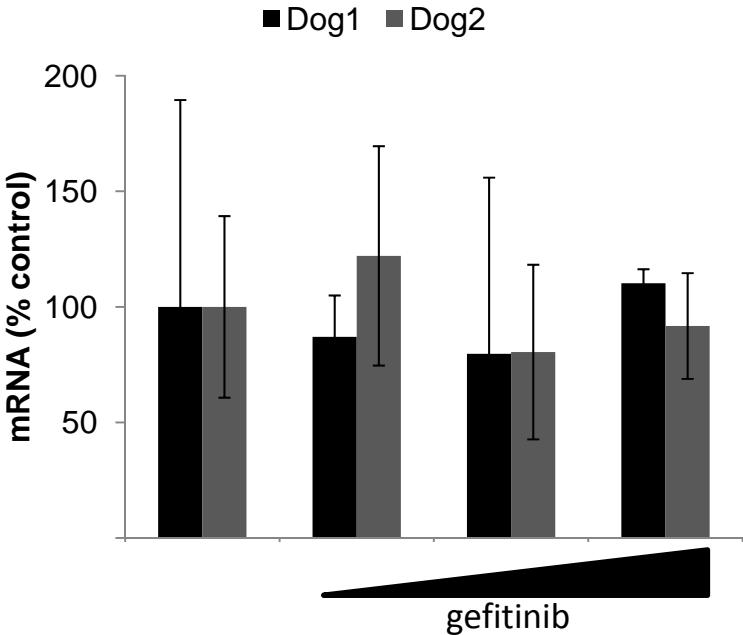

Supplement: sd1 [file 1]
